## **Chromium/cadmium plays a pivotal role to emerge amoxicillin resistant *Staphylococcus aureus***

Tajreen Naziba Islam<sup>1@</sup>, Foujia Samsad Meem<sup>1@</sup>, Rahena Yasmin<sup>1</sup>, Mohammed Badrul Amin<sup>2</sup>, Tania Rahman<sup>1</sup>, David H. Dockrell<sup>3</sup>, Md Mohasin<sup>1\*</sup>

<sup>1</sup>Infection and Immunity Laboratory, Department of Biochemistry and Molecular Biology, University of Dhaka, Dhaka, Bangladesh

<sup>2</sup>International Center for Diarrhoeal Disease Research, Bangladesh (ICDDR,B), Dhaka, Bangladesh

<sup>3</sup>The MRC Centre for Inflammation Research, University of Edinburgh, United Kingdom

@ co-first author

\*Corresponding author:

Md. Mohasin Ph.D

Email: mohasin@du.ac.bd

Keywords: Antimicrobial Resistance, Heavy metals, Staphylococcus, Efflux pumps

## 1 **Abstract**

2 Rationale: The rapid emergence of resistant bacteria is occurring worldwide,  
3 endangering the efficacy of antimicrobials. Apart from horizontal gene transfer and  
4 plasmid mediated antimicrobial resistance (AMR) acquisition, co-exposure of heavy  
5 metals and antibiotics cause to emerge AMR Enterobacteriaceae. Heavy metals and  
6 antimicrobials co-exist in many environmental settings. We hypothesized that heavy  
7 metals and lower dose of antibiotic co-exposure may alter levels of antimicrobial  
8 susceptibility and facilitate to emerge AMR bacteria.

9 Methods: The growth kinetics of antimicrobial susceptible *Staphylococcus aureus*  
10 ST80 was carried out in the presence of chromium/cadmium salt and a lower dose of  
11 antibiotics. Subsequently, the antimicrobials susceptibility patterns of heavy metals  
12 pre-exposed for 48 hours *Staphylococcus aureus* ST 80 was determined by Kirby-  
13 Bauer disc diffusion method.

14 Results: The antimicrobial susceptibility profile revealed that the zone of inhibition  
15 (ZOI) for ampicillin, amoxicillin, ciprofloxacin and doxycycline significantly  
16 decreased in chromium pre-exposed *Staphylococcus* compared to unexposed bacteria.  
17 However, cadmium pre-exposed bacteria only showed significant decreased ZOI for  
18 amoxicillin. Moreover, the MIC of amoxicillin was increased by 8-fold in chromium  
19 and 32-fold in cadmium with a low-dose of amoxicillin co-exposed bacteria. Besides,  
20 the RT-qPCR data demonstrated that chromium and a low-dose of amoxicillin pre-  
21 exposed significantly increased the mRNA expression of *femX* (25-fold), *mepA* (19-  
22 fold) and *norA* (17-fold) in *S. aureus*.

23 In essence, minimum levels of chromium/cadmium and a MIC of amoxicillin  
24 exposure induced efflux pumps, which might responsible to emerge amoxicillin  
25 resistant *S. aureus*.

## 26 **1. Introduction**

27 Antibiotic resistance is one of the major global problems and threatens the usefulness  
28 of nearly all antibiotics that was discovered to alleviate microbial infections (1).  
29 Several studies have proved that antimicrobial agents other than antibiotics have the  
30 capability to cause antibiotic resistance through a co-selection process (2, 3). In  
31 addition to antibiotic resistance, heavy metal contamination is another severe  
32 ecological problem (4, 5). Antibiotic and heavy metals co-exist in the environment  
33 such as in the gastrointestinal tract, animal manure, and poultry farming sites (6-9).  
34 For instance, arsenic and antibiotics are widely used in poultry farms as growth  
35 promotion and disease control agents thus the gut microbiota of domestic animals is  
36 getting exposed to both antibiotics and heavy metals. Additionally, fertilizers made  
37 from manure and sewage sludge containing those substances are extensively used in  
38 the agricultural soil that eventually leach into the water (3, 10). As a result, humans  
39 are exposed to these heavy metals through the contamination of the food chain as  
40 heavy metals are not easily bio-degradable (4, 11). Several studies have reported that  
41 the elevated concentration of heavy metals can induce antibiotic resistance (3, 7, 12).  
42 According to Seiler & Berendonk, 2012, the combined effect of heavy metals or  
43 metals and antibiotics discharged into soil and water bodies maybe responsible for the  
44 spread of antimicrobial resistance as well as the evolution of multidrug resistance.  
45 Moreover, Peltier et al. reported that co-exposure of metal like Zinc and  
46 oxytetracycline promotes microbial resistance towards oxytetracycline (13).  
47 Similarly, another study demonstrated that addition of Copper (Cu) in agricultural  
48 soils not only arises Cu resistance but also co-selects for resistance to ampicillin,  
49 chloramphenicol and tetracycline (14). Recently, Chen et al., has demonstrated that  
50 the growth of LSJC7, an Enterobacteriaceae strain significantly increased in arsenate

51 and tetracycline co-exposure milieu compared with only tetracycline treated growth  
52 (9). The possible mechanism of such condition could be due to the presence of heavy  
53 metals induced growth of microbial community having resistance genes beforehand,  
54 or through co-selection process heavy metals and antibiotics together stimulated  
55 microbial resistance to the antibiotics that was previously sensitive (9). In this study,  
56 we hypothesized that bacterial growth with a lower dose of heavy metals or  
57 antibiotics may alter antimicrobials susceptibility and the expression patterns of efflux  
58 pumps genes, which are responsible to emerge antibiotic resistant bacteria. The  
59 antimicrobial sensitivity profile and growth kinetics of *Staphylococcus aureus* ST80  
60 was determined in the presence of chromium or cadmium salts. This study has  
61 revealed that growth of *S. aureus* with a lower dose of chromium or cadmium and  
62 amoxicillin was significantly increased the minimum inhibitory concentration (MIC)  
63 of amoxicillin and also facilitate to acquire amoxicillin resistance through alter the  
64 expression of efflux pumps and femX gene.

65  
66  
67

## 2. Methods and Materials

68 **Place of Study:** This study was carried out at the Infection and Immunity Laboratory  
69 in the Department of Biochemistry and Molecular Biology, University of Dhaka,  
70 Bangladesh.

71

### 72 **Collection of *Staphylococcus aureus* ST80**

73 Several skin, soft-tissue, respiratory, bone, joint, and endovascular disorders are  
74 associated with *Staphylococcus aureus*, which is responsible for numerous infectious  
75 diseases (15). In this study, the *Staphylococcus aureus* ST80 was isolated from  
76 processed raw meat (meat ball) of a local restaurant by Food Microbiology  
77 Laboratory, Laboratory Sciences and Services Division, International Center for  
78 Diarrhoeal Disease Research, Bangladesh (ICDDR,B).

### 79 **Measurement of Heavy metal levels in Industrial wastewater:**

80 Samples of Industrial wastewater were collected from Buriganga and Dhaleswari  
81 river. To compare the effectiveness of effluent treatment process (ETP), we had also  
82 collected wastewater directly from some tanneries and textile industries before ETP  
83 and after ETP. Briefly, to determine the levels of heavy metals wastewater was  
84 dissolved in 65% nitric acid (HNO<sub>3</sub>) in order to minimize precipitation by bringing  
85 the pH lower than 2.0 (Hassan et al., 2015). 5mL of 65% concentrated HNO<sub>3</sub> was  
86 added in each volumetric flasks containing 100 mL of wastewater. It was then gently  
87 boiled until complete dissolved on a hot plate in a fume hood, cooled prior to  
88 filtration using Whatman™ qualitative filter paper (16). Finally, each water samples  
89 were loaded onto Flame Atomic Absorption Spectrophotometer for analysis and  
90 detection of heavy metals like Cr, Cd, and Pb. Before running the samples in AAS,  
91 the instrument was first calibrated with chemical standard solutions according to the  
92 manufacturer's instructions (17).

### 93 **Preparation of Agar Media for Culturing the Bacteria**

94 To culture bacteria in a solid media, Tryptone Soya Agar (TSA) media was used. The  
95 TSA powder was measured using a balance (Shimadzu ELB200, Japan) and taken  
96 into a conical flask. After adding desired volume of distilled water in the conical  
97 flask, the mixture was mixed with the help of a magnetic stirrer. It was then  
98 autoclaved at 121<sup>0</sup>C under 15 psi for 20 minutes. The media preparation was carried  
99 out in the biosafety cabinet in order to avoid contamination. The media was poured in  
100 the petridish and allowed to solidify for a few minutes. The *Staphylococcus aureus*  
101 ST80 was streaked on the prepared agar plate from the collected culture plate using  
102 the inoculation loop. The plate was then placed in the incubator (Memmert, Germany)  
103 at 37<sup>0</sup>C and allowed to grow the bacteria overnight. After 16 hours, the plate  
104 containing the colony of the bacteria was stored in the refrigerator at 4<sup>0</sup>C.

### 105 **Dose-response growth kinetics in presence of chromium (Cr<sup>6+</sup>) salt**

106 *Staphylococcus aureus* ST80 was grown in 0.5mM, 1mM, 3mM, 5mM, 10mM,  
107 50mM, 100mM chromium salt in Tryptone Soya broth (TSB) media and O.D value  
108 was recorded at 600nm using UV-Vis spectrophotometer (Thermo-Scientific).

### 109 **Dose-response growth kinetics in presence of cadmium (Cd<sup>2+</sup>) salt**

110 *Staphylococcus aureus* ST80 was grown in 0.005mM, 0.01mM, 0.025mM, 0.05mM,  
111 0.075mM, 0.1mM, 0.3mM, 0.5mM, 0.75mM cadmium salt in Tryptone Soya broth  
112 (TSB) media and O.D value was recorded at 600nm using UV-Vis spectrophotometer.

113

## 114 **Standardization of Tryptone Soya Medium**

115 TSB medium containing bacterial solution was carried out for the serial dilution  
116 using 0.9% saline under the laminar flow. 1mL TSB media was transferred in a  
117 tube, centrifuged at 4000 rcf for 3 minutes. The liquid suspension was discarded,  
118 and the bacterial pellet was diluted with 1mL saline solution. This step was  
119 repeated two times to achieve pure bacterial culture. These media were then  
120 standardized through spectrophotometry method.  $1.0 \times 10^8$  CFU/ml of bacterial  
121 concentration were assured in each of the cultured sample in TSB medium, which  
122 was represented by 0.125 OD.

123

## 124 **Pre-screening Antibiotic susceptibility pattern in presence of chromium and** 125 **cadmium (for Table)**

126 Bacteria was grown in three conical flasks with concentration of 0.0 mM, 0.5 mM,  
127 1.0 mM chromium containing TSB media. For cadmium, 2 mM stock solution of  
128 salt ( $\text{CdCl}_2 \cdot \text{H}_2\text{O}$ ) was prepared by dissolving 0.02g  $\text{CdCl}_2 \cdot \text{H}_2\text{O}$  ( $\text{Cd}^{2+}$ ) in 50 mL  
129 distilled water and heated and mixed using magnetic stirrer to dissolve the solvent  
130 completely. Then concentration of 0.0 mM, 0.05 mM, 0.1 mM cadmium containing  
131 TSB media were prepared from stock solution in another three conical flask.  $10 \mu\text{L}$   
132 equivalent to  $1.0 \times 10^8$  cfu/mL of standardized bacterial suspension was added in  
133 each flask. The liquid broth flasks were then placed into shaking incubator at  $37^\circ\text{C}$ ,  
134 180 rpm for 12 hours. Then  $100 \mu\text{l}$  of pre-exposed bacterial solution from each  
135 conical flask was spread on several Mueller-Hinton agar plates using sterile  
136 spreader. Antibiotic discs were then impregnated on the surface of agar plate using  
137 sterile forceps. 18 agar plates were prepared and out of 9 antibiotics 3 antibiotics  
138 were placed in each agar plate. All the plates were then incubated at  $37^\circ\text{C}$  for a  
139 period of 16-24 hours. The diameter of the zone of inhibition around the disc was  
140 measured using a millimeter scale and compared to the CLSI reference table to  
141 determine if the organism is susceptible, intermediate or resistant against the  
142 antibiotic agents tested.

## 143 **Metal and Antibiotic Analysis on pre-exposed Bacterium:**

144 To determine the effect of  $\text{Cr}^{6+}$  and Amoxicillin on *Staphylococcus aureus* ST80  
145 growth, the bacterium was grown on different conditions.

146 a)  $\text{Cr}^{6+}$  pre-exposed SA

147 b)  $\text{Cr}^{6+}$  exposed in  $\text{Cr}^{6+}$  pre-exposed SA

148 c) Amoxicillin exposed in  $\text{Cr}^{6+}$  pre-exposed SA

149 d) Amoxicillin and  $\text{Cr}^{6+}$  co-exposed in  $\text{Cr}^{6+}$  pre-exposed SA

150 e) Amoxicillin exposed in  $\text{Cr}^{6+}$  unexposed SA

151 f) Amoxicillin and  $\text{Cr}^{6+}$  co-exposed in  $\text{Cr}^{6+}$  unexposed SA

152

153 **Co-exposure effect of amoxicillin treatment upon bacterial growth in presence of**  
154  **$\text{Cr}^{6+}$  salt**

155 1.5g TSB was taken in each of two conical flasks. To prepare 0.5mM chromium  
156 containing liquid broth, 0.0074g of  $\text{K}_2\text{Cr}_2\text{O}_7$  was measured and added into one conical  
157 flask. Then the reagents were dissolved using 50mL distilled water and sterilized by  
158 autoclaving the media. 50mL of each media was then poured into two different  
159 centrifuge tubes. 0.06  $\mu\text{g}/\text{mL}$  of Amoxicillin was added into one chromium containing  
160 tube and one TSB media containing tube. 10 $\mu\text{L}$  equivalent to  $1.0 \times 10^8$  cfu/mL of  
161 standardized bacterial suspension was added in each centrifuge tube except blank  
162 tube. The liquid broth tubes were then placed into shaking incubator at 37°C, 180 rpm  
163 and the optical density of each tube was taken at 600 nm in every hour (9). Before  
164 that, blank of each condition was performed.

165 **Co-exposure effect of amoxicillin treatment upon bacterial growth in presence of**  
166  **$\text{Cd}^{2+}$  salt**

167 In each of two conical flasks, 1.5g TSB was taken. Now to prepare 0.025mM  $\text{Cd}^{2+}$   
168 containing media; 0.625 mL stock of cadmium salt was added in one conical flask and  
169 the final volume was made 50mL with distilled water. All liquid broth media was then  
170 autoclaved and allowed to cool down in room temperature. 25mL of each media was  
171 poured into four different centrifuge tubes. 0.06  $\mu\text{g}/\text{mL}$  of Amoxicillin was added into  
172 one cadmium containing tube and one TSB media containing tube. One of each tubes  
173 were provided with 10 $\mu\text{L}$  of standardized bacterial suspension and placed into  
174 shaking incubator at 37°C, 180 rpm and the optical density of each tube was taken at

175 600 nm in every hour (9). Blank of each condition was performed before measuring  
176 optical density of different conditions.

177

178 **Determination of Minimum Inhibitory Concentration of SA upon treatment with**  
179 **a Sub-lethal dose of Chromium salt  $K_2Cr_2O_7$  ( $Cr^{6+}$ ) and Amoxicillin Using Agar**  
180 **Dilution Method:**

181 SA was grown in Liquid Broth media supplemented with 0.5mM chromium,  
182 0.06 $\mu$ g/ml Amoxicillin and a medium containing 0.5mM chromium and 0.06 $\mu$ g/ml  
183 Amoxicillin both respectively for 12 hours, 24 hours and 48 hours in a continuous  
184 batch culture system (fresh TSB culture media with or without chromium salt and  
185 amoxicillin supplement was changed in 12 hours interval). After 48hours of exposure  
186 in stressed condition, the bacterial culture was purified using NaCl and the turbidity  
187 was adjusted to O.D<sub>600</sub> value 0.125. Solutions of 25 mL Tryptone soya Agar (TSA)  
188 were prepared for each condition and autoclaved. Before transferring the solution to  
189 the plate 0.06 $\mu$ g/mL, 0.125 $\mu$ g/mL, 0.25 $\mu$ g/mL, 0.5 $\mu$ g/mL concentration of antibiotics  
190 were added into the conical flasks (Yao et al., 2019). The control media contained no  
191 antibiotic. The antibiotics were added after cooling down the medium to 50°C cause  
192 higher temperature may inactive the antibiotic and in low temperature the agar will  
193 begin forming solid clumps. The media was poured into petri dishes and solidified.  
194 After that, 10 $\mu$ L of bacterial culture from each condition (equivalent to 10<sup>5</sup>cfu) was  
195 spotted (total three identical spot) in each agar plate. The plates were placed in  
196 incubator for 16 hours at 37°C and the MIC of each condition was observed (18). The  
197 MIC of this bacterium (grown in presence of both chromium salt and amoxicillin)  
198 increased 8fold compared to control as the bacterial growth was found in the media  
199 containing 0.50 $\mu$ g/ml concentrations of Amoxicillin.

200 **Evaluation of Minimum Inhibitory Concentration Using Agar Dilution Method**  
201 **for  $CdCl_2 \cdot H_2O$  ( $Cd^{2+}$ )**

202 25mL Tryptone soya Agar (TSA) plates were prepared for each condition. Then the  
203 autoclaved 25mL TSA was transferred and 0.06 $\mu$ g/mL, 0.125 $\mu$ g/mL, 0.25 $\mu$ g/mL,  
204 0.5 $\mu$ g/mL, 1.0 $\mu$ g/mL, 2.0 $\mu$ g/mL, 4.0 $\mu$ g/mL concentration of antibiotics were added  
205 into the conical flasks (Yao et al., 2019). The control media contained no antibiotic.  
206 The antibiotics were added after cooling down the medium to 50°C cause higher



207 temperature may inactive the antibiotic and in low temperature the agar will begin  
208 forming solid clumps. The media was poured into Petri dishes and solidified. After  
209 that, 10 $\mu$ L of standardized bacterial suspension (equivalent to 10<sup>5</sup>cfu) containing  
210 inoculum was spotted (total three identical spot) in each agar plate. Thereafter, the  
211 bacterial plates were incubated for overnight culture at 37<sup>0</sup>C and the MIC of each  
212 condition was observed (18). The bacteria were grown in presence of both cadmium  
213 and amoxicillin (maximum 2.0  $\mu$ g/mL), demonstrating 32-fold increase of MIC  
214 compared to control. Earlier, *Staphylococcus aureus* containing bacterial suspensions  
215 were prepared from Tryptone soya broth culture medium, which was pretreated  
216 with or without 0.025 mM Cd<sup>2+</sup>, 0.06 $\mu$ g/mL Amoxicillin or a combination of 0.025  
217 mM Cd<sup>2+</sup> and 0.06  $\mu$ g/mL Amoxicillin for 12 hours, 24 hours and 48 hours in a  
218 continuous batch culture system.

219

#### 220 **Antimicrobial susceptibility test (Disc-Diffusion Method)**

221 To perform the Kirby-Bauer disc diffusion method, Mueller-Hinton Agar medium is  
222 best considered according to Clinical Laboratory Standards Institute (CLSI guideline,  
223 2017) for Antimicrobial Susceptibility Test. To determine the difference of zone of  
224 inhibition, this experiment was carried out in 0.95g of MHA, measured using a  
225 balance (Shimadzu ELB200, Japan) and dissolved in distilled water in order to make  
226 25 mL solution for each 100mm petri dish. All the mixtures were autoclaved at 121<sup>0</sup>C  
227 under 15 psi for 20 minutes. The mixtures were then transferred from the conical flask  
228 into petri dishes and allowed to solidify for a few minutes. Bacteria from both the  
229 MIC value under chromium and cadmium stressed was grown in TSB media. Then  
230 100 $\mu$ L of respective bacterial suspension was spread over the agar plates using  
231 sterilized spreader and the filter paper discs of Amoxicillin were carefully dispensed  
232 on the surface of each agar plates using sterile forceps. All these steps were carried  
233 out in the laminar flow to maintain aseptic condition. The plates were then incubated  
234 at 37<sup>0</sup>C for 16 hours. Afterwards, the diameter of the zone of inhibition around the  
235 disc was measured.

236 **Table 2.1:** Standard clear zone diameter of different antibiotics represents Sensitivity,  
237 Moderate Sensitivity and Resistance (CLSI, guideline 2017, M100, 27<sup>th</sup> Edition.)

| Name of Antibiotic | Disk concentra | Symbol | Zone of Inhibition (diameter in mm) |
|--------------------|----------------|--------|-------------------------------------|
|--------------------|----------------|--------|-------------------------------------|

|                 | tion<br>( $\mu\text{g}/\text{disk,}$ ) |         | Sensitive | Intermediate | Resistance |
|-----------------|----------------------------------------|---------|-----------|--------------|------------|
| Amoxicillin     | 10                                     | AX 10   | $\geq 29$ | -            | $\leq 28$  |
| Ampicillin      | 10                                     | AM 10   | $\geq 27$ | -            | $\leq 26$  |
| Azithromycin    | 15                                     | AZ 15   | $\geq 18$ | 14-17        | $\leq 13$  |
| Cephadrine      | 30                                     | CE 30   | $\geq 22$ | -            | -          |
| Chloramphenicol | 30                                     | C 30    | $\geq 18$ | 13-17        | $\leq 12$  |
| Ciprofloxacin   | 5                                      | CIP 5   | $\geq 21$ | 16-20        | $\leq 15$  |
| Clindamycin     | 2                                      | CD/DA 2 | $\geq 21$ | 15-20        | $\leq 14$  |
| Doxycycline     | 30                                     | DO 30   | $\geq 16$ | 13-15        | $\leq 12$  |
| Erythromycin    | 15                                     | E 15    | $\geq 23$ | 14-22        | $\leq 13$  |
| Methicillin     | 5                                      | MET 5   | $\geq 18$ | -            | $\leq 17$  |
| Vancomycin      | 30                                     | VA 30   | $\geq 15$ |              |            |

238

239 **Reverse transcription qPCR for evaluation the expression patterns of efflux**  
240 **pumps and femx gene**

241 **RNA Extraction and cDNA synthesis:**

242 *S. aureus* is lysozyme resistant due to the presence of modified peptidoglycan layer  
243 (19), hence the specialized lysis steps are required for RNA isolation other than  
244 lysozyme. Previous studies were evaluated several methods to achieve high quantity  
245 and quality RNA (20). To recover maximum yield of RNA, the simple phenol method  
246 as the most effective one for cell lysis compared to commercially available RNA  
247 extraction Kit (20). Here, we have used Monarch® Total RNA Miniprep Kit to  
248 conduct subsequent steps of RNA isolation. To check the quality of RNA, agarose gel  
249 electrophoresis was performed. Next, cDNA synthesis of purified RNA was  
250 performed using ProtoScript® II First Stand cDNA synthesis Kit (20).

251 **RT-qPCR method for Quantitative Efflux pump Gene Expression**

252 Previous studies have demonstrated that heavy metals have a positive effect on the  
253 expression of bacterial efflux pumps, which may alter drugs susceptibility towards  
254 bacteria (21-24). To quantify the expression of efflux pumps, the *S. aureus* was grown  
255 in media with a minimum level of chromium salt or amoxicillin or both. Earlier

256 studies have shown that the  $\beta$ -lactam-related antibiotics are affected by fem factors,  
257 which are responsible for peptidoglycan biosynthesis of cell-wall metabolism (19).  
258 The *norA* and *mepA* are chromosomally encoded efflux pumps of *S. aureus*, which  
259 are often used to assess multi-drug resistance profile of *S. aureus* (25-27). Expression  
260 levels of *femX*, *mepA* and *norA* was determined using the above-mentioned cDNA  
261 and the following PCR primers (Table 2.2 and 2.3) and SYBER-green and PCR-  
262 master mix (New England Biolabs). To calculate relative gene expression compared to  
263 house-keeping GAPDH, comparative threshold cycle was used (25, 28).

264 Table 2.2: Primer sequence, size and product size

| Name of Gene | Primer sequence              | Length (bp)  | Product size (bp) |
|--------------|------------------------------|--------------|-------------------|
| femX         | 5'GCGAAGAATCGCTGTAGGTC3'     | 20 (forward) | 193               |
|              | 5'TGCATACGCTTTCTCAGCTT3'     | 20 (reverse) |                   |
| norA         | 5'TGGCCACAATTTTCGGTAT3'      | 20 (forward) | 182               |
|              | 5'CACCAATCCCTGGTCCTAAA3'     | 20 (reverse) |                   |
| mepA         | 5'TGCTGCTGCTCTGTTCTTTA3'     | 20 (forward) | 198               |
|              | 5'GCGAAGTTTCCATAATGTGC3'     | 20 (reverse) |                   |
| GAPDH        | 5'TGACACTATGCAAGGTCGTTTCAC3' | 24 (forward) | 180               |
|              | 5'TCAGAACCGTCTAACTCTTGGTGG3' | 24 (reverse) |                   |

265

266 Table 2.3: Reagent for RT-qPCR with volumes

| Name of Reagent                 | Volume      |
|---------------------------------|-------------|
| Template: cDNA                  | 1.0 $\mu$ L |
| SYBR-Green master mix           | 10 $\mu$ L  |
| 1 $\mu$ M primer Forward (25nM) | 1.0 $\mu$ L |
| 1 $\mu$ M primer Forward (25nM) | 1.0 $\mu$ L |

|                     |             |
|---------------------|-------------|
| Nuclease free water | 7.0 $\mu$ L |
| Total volume        | 20 $\mu$ L  |

267

## 268 **Statistical Analysis**

269 All statistical analyses were done using a software called GraphPad Prism version 6.0.  
270 To compare the differences of bacterial growth between heavy metal treated and  
271 untreated (control) media. The Analysis of Variance (One-way ANOVA) was  
272 performed. Data are expressed as mean  $\pm$  SEM (Standard Error of Mean). Values of  
273  $p < 0.05$  are considered as statistically significant.

274

## 275 **3. Results**

276

### 277 **Isolation of *S. aureus* and culture**

278

279 In this study, *Staphylococcus aureus* ST 80 was isolated from processed raw meat  
280 (meat ball) of a local restaurant by Food Microbiology Laboratory, Laboratory  
281 Sciences and Services Division, International Centre for Diarrhoeal Disease Research,  
282 Bangladesh (ICDDR,B). *S. aureus* is a rod-shaped, Gram-positive and facultative  
283 anaerobic microorganism. It is non-fastidious and grow well in Tryptone Soya  
284 medium. In this media, at mid-log phase the average viable count of was  
285 approximately  $1 \times 10^8$  cfu/mL, which was counted from bacterial suspension through  
286 Miles-Misra serial dilution method.

287

### 288 **Presence of heavy metals in water bodies or industrial discharge points**

289 In Dhaka, heavy metals are used in the industries like tannery, textile as a source of  
290 paints, welding, brazing, soldering, dyes and pigments (29). These industrial effluents  
291 are being directly contaminated rivers, canals and agricultural fields through  
292 irrigation channels. Recent studies have shown the presence of heavy metals in the  
293 food chains in Bangladesh (4, 30, 31). To measure the levels of heavy metals in the  
294 industrial discharge points, we collected water samples from 8 points and measured  
295 levels of chromium, cadmium and lead by atomic absorption spectrometry. The  
296 concentrations of heavy metals in effluent and river water samples are presented in  
297 Table 3.1. The order of heavy metal content is  $Cr > Pb > Cd$  with respective

298 concentrations (mg/L) of 2733.10, 0.145 and 0.100 in effluent water which exceeded  
 299 the WHO (2011) standard.

300 Table 3.1: **Presence of chromium, lead and cadmium at industrial wastewater**

| Source of Sample              | Pb (mg/L) | Cd (mg/L) | Cr (mg/L) |
|-------------------------------|-----------|-----------|-----------|
| Tannery-1 (Before ETP)        | 0.145     | 0.100     | 2733.10   |
| Tannery-2 (Before ETP)        | 0.189     | BDL       | 37.54     |
| Tannery-3 (Before ETP)        | 2.704     | BDL       | 58.54     |
| Textile-2 (Before ETP)        | 0.094     | BDL       | BDL       |
| Textile-1 (Before ETP)        | 0.081     | BDL       | BDL       |
| Textile-1 (After ETP)         | 0.140     | BDL       | BDL       |
| Dhaleshwari River (After ETP) | 1.295     | BDL       | 1.52      |
| WHO water quality standard    | 0.01      | 0.01      | 0.05      |

301 Note: ETP-effluent treatment plant. Heavy metals detection limits for Lead 0.04 mg/L, Chromium 0.04  
 302 mg/L and Cadmium 0.02 mg/L by Atomic Absorption Spectrophotometer (BDL means below  
 303 detection level).

304

### 305 **Growth Kinetics of *S. aureus* in the presence of Chromium salt**

306 *Staphylococcus aureus* ST80 was grown in Tryptone soya broth supplemented with  
 307 0.5mM, 1mM, 3mM, 5mM, 10mM, 50mM or 100mM chromium salt and in control  
 308 without chromium. The growth curve (Figure 1A) demonstrated that *Staphylococcus*  
 309 *aureus* ST80 tolerates up to 3mM Cr<sup>6+</sup> salt. The growth kinetics data also showed  
 310 bacterial growth was inhibited in presence of 5 mM or more concentration of  
 311 chromium salt. Therefore, 0.5-3.0 mM concentrations of chromium salt were  
 312 considered as the tolerable level of chromium for *S. aureus* ST80 growth.

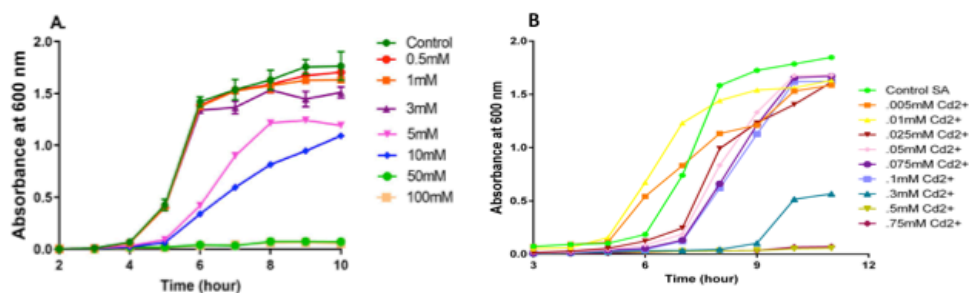

313

314

315 **Figure 1: Tolerable levels of chromium and cadmium of *S. aureus* growth.** Figure  
316 (A) shows the Growth curve of *S. aureus* with different doses of chromium, and  
317 figure (B) shows the Growth kinetics of *S. aureus* with different doses of cadmium  
318 salt.

319 On the other hand, *Staphylococcus aureus* ST80 was also grown in Tryptone soya  
320 broth in presence of different doses (0.005 mM to 0.75 mM) of cadmium salt. The  
321 growth curve (Figure 1B) demonstrated that *Staphylococcus aureus* ST80 tolerates up  
322 to 0.1 mM Cd<sup>2+</sup> salt. The growth kinetics data also showed bacterial growth was  
323 inhibited in presence of 0.3 mM or more concentration of cadmium salt. Therefore,  
324 0.005 to 0.1 mM concentrations of cadmium salt were considered as the tolerable  
325 level of cadmium for *S. aureus* ST80 growth.

326

### 327 **Screening the pre-exposure effect of chromium or cadmium on antimicrobial** 328 **sensitivity patterns**

329 A few studies have reported that exposure to metal or heavy metal would not only  
330 cause bacteria to develop metal resistance, but antibiotic resistance via co-selection  
331 mechanism. However, there is no experimental evidence whether heavy metal like  
332 chromium is directly involved to develop multi-drug resistance in *S. aureus*. To  
333 examine this hypothesis, Azithromycin 15µg, Chloramphenicol 30µg, Ampicillin  
334 10µg, Amoxicillin 10µg, Erythromycin 15µg, Doxycycline 30µg, Ciprofloxacin 5µg,  
335 Cephadrine 30µg, Clindamycin 2µg, Methicillin 5µg and Vancomycin 30µg,  
336 antibiotic discs were impregnated on Mueller-Hinton or Tryptone Soya agar plates  
337 containing chromium or cadmium pre-exposed *S. aureus*. After 20 hours of  
338 incubation at 37<sup>0</sup> C, the antibiotic susceptibility profile was determined by Kirby-  
339 Bauer disc diffusion method and the zone of inhibition (ZOI) were interpreted  
340 following the Clinical Laboratory Standard Institute (CLSI, USA) guideline, 2017 for  
341 *S. aureus*. The antibiotic susceptibility pre-screening data demonstrated that *S. aureus*  
342 pre-exposed to either chromium or cadmium, in both conditions showed increased  
343 resistance to amoxicillin only compared to heavy metals unexposed control, whereas  
344 no significant changes were observed for rest of the antibiotics (Table 3.2).

345

346 **Table 3.2: Screening the pre-exposure effect of chromium or cadmium on**  
347 **antibiotic susceptibility patterns of *Staphylococcus aureus***

| Name of Antibiotic     | Chromium pre-treatment |                |         | Cadmium pre-treatment  |                |         |
|------------------------|------------------------|----------------|---------|------------------------|----------------|---------|
|                        | Level of Chromium      | ZOI (mm)       | p-value | Level of Cadmium       | ZOI (mm)       | p-value |
| <b>Amoxicillin</b>     | 0mM<br>0.5mM<br>1.0mM  | 36<br>30<br>27 | 0.05    | 0.0<br>0.05mM<br>0.1mM | 37<br>33<br>30 | 0.01    |
| <b>Ciprofloxacin</b>   | 0mM<br>0.5mM<br>1.0mM  | 35<br>34<br>30 | 0.05    | 0.0<br>0.05mM<br>0.1mM | 32<br>30<br>28 | NS      |
| <b>Azithromycin</b>    | 0mM<br>0.5mM<br>1.0mM  | 29<br>29<br>26 | NS      | 0.0<br>0.05mM<br>0.1mM | 27<br>26<br>26 | NS      |
| <b>Chloramphenicol</b> | 0mM<br>0.5mM<br>1.0mM  | 28<br>27<br>26 | NS      | 0.0<br>0.05mM<br>0.1mM | 32<br>31<br>31 | NS      |
| <b>Ampicillin</b>      | 0mM<br>0.5mM<br>1.0mM  | 36<br>36<br>33 | 0.05    | 0.0<br>0.05mM<br>0.1mM | 37<br>35<br>35 | NS      |
| <b>Erythromycin</b>    | 0mM<br>0.5mM<br>1.0mM  | 30<br>30<br>30 | NS      | 0.0<br>0.05mM<br>0.1mM | 32<br>32<br>32 | NS      |
| <b>Clindamycin</b>     | 0mM<br>0.5mM<br>1.0mM  | 31<br>31<br>29 | NS      | 0.0<br>0.05mM<br>0.1mM | 34<br>33<br>32 | NS      |
| <b>Doxycycline</b>     | 0mM<br>0.5mM<br>1.0mM  | 31<br>31<br>29 | 0.05    | 0.0<br>0.05mM<br>0.1mM | 34<br>33<br>31 | NS      |
| <b>Cephradine</b>      | 0mM<br>0.5mM<br>1.0mM  | 32<br>31<br>30 | NS      | 0.0<br>0.05mM<br>0.1mM | 32<br>31<br>30 | NS      |

348 Note: NS-non-significance, Data were analyzed The Analysis of Variance (One-way ANOVA) and  
 349 Sidak multiple comparison tests was performed.

350 **Co-exposure Effect of Chromium and Amoxicillin Trihydrate or Cadmium and**  
 351 **Amoxicillin on growth of *Staphylococcus aureus***

352 *S. aureus* ST80 was grown in the Tryptone soya broth, which supplemented with or  
 353 without 0.5 mM chromium salt or 0.06 µg/mL Amoxicillin, or both chromium and  
 354 Amoxicillin. The growth curve (**Figure 2A**) has demonstrated that the chromium pre-  
 355 exposed *S. aureus* ST80 growth were comparable with chromium un-exposed  
 356 bacterial control. However, after treated with amoxicillin, the growth of chromium  
 357 pre-exposed or exposed *S. aureus* was significantly increased compared to chromium  
 358 un-exposed control. Quantitatively, Amoxicillin trihydrate or chromium treatment alone

359 decreased bacterial growth by 52.3% compared to control, whereas the bacterial  
 360 growth rate was enhanced up to 77.3% in 0.5mM chromium salt and 0.06  $\mu\text{g}/\text{mL}$   
 361 Amoxicillin trihydrate co-exposed condition. Overall, this growth kinetics data have  
 362 demonstrated that chromium pre-exposure or re-exposure were minimized the  
 363 inhibitory effect of Amoxicillin on growth of *S. aureus*, suggesting the existence of  
 364 chromate enhanced Amoxicillin resistance. Mid-log phase data (**Figure 2B**)  
 365 demonstrated that bacteria exposed to amoxicillin showed decreased growth  
 366 compared to control but bacteria pre-exposed to chromium and amoxicillin showed  
 367 significant changes in growth. Again, bacterial growth under chromium co-exposure  
 368 and amoxicillin was less than only chromium co-exposed bacteria, but this difficulty  
 369 was overcome by bacteria pre- and co-exposed to chromium as well as amoxicillin,  
 370 indicating that amoxicillin, chromium pre- and co-exposed bacteria superceded the  
 371 growth rate of any single stressed bacteria.

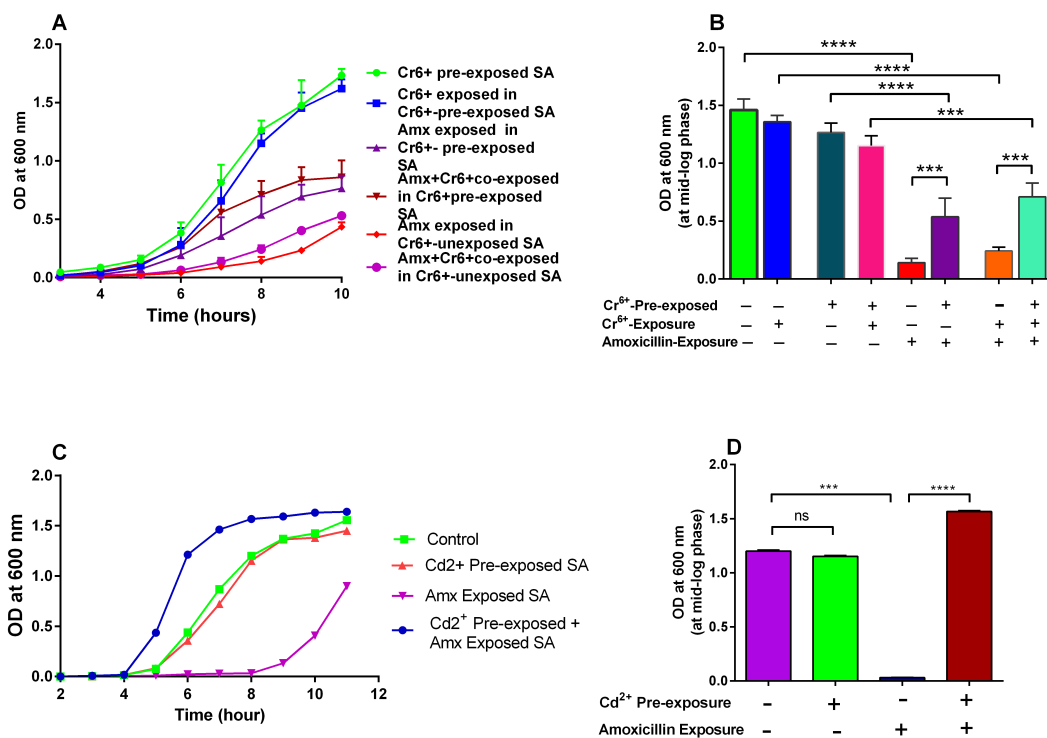

372  
 373 **Figure 2: Co-exposure Effect of Chromium and Amoxicillin Trihydrate or**  
 374 **Cadmium and Amoxicillin Trihydrate on *Staphylococcus aureus* growth.** (A)  
 375 Growth curve of *Staphylococcus aureus* ST80 in presence of chromium salt and  
 376 amoxicillin. (B) Growth rate of *Staphylococcus aureus* ST80 at mid-log phase (at 8  
 377 hours post-exposure). (C) Growth curve of *Staphylococcus aureus* ST80 in presence  
 378 of cadmium salt and amoxicillin. (D) Growth rate of *Staphylococcus aureus* ST80 at



379 mid-log phase (at 8 hours post-exposure). 10 $\mu$ l (e.g.  $1 \times 10^5$  cfu) of bacterial suspension  
380 was added in 30 mL Tryptone Soya broth (TSB) media. The bacterial growth was  
381 measured at 600 nm. The Data shows Mean  $\pm$  SEM and  $p < 0.05$ ,  $**p < 0.01$ ,  $n = 3$ .

382

383 On the other hand, *Staphylococcus aureus* ST80 was also grown in Tryptone soya  
384 broth in presence of 0.025 mM cadmium salt or 0.06 $\mu$ g/mL Amoxicillin, or both  
385 cadmium and Amoxicillin and in control without any stress. The growth curve  
386 (**Figure 2C**) has demonstrated that Amoxicillin trihydrate alone decreased bacterial  
387 growth by 52.3% compared to control, whereas this value was enhanced up to 82.6%  
388 for cadmium co-exposed bacterial growth rate. That means bacterial growth under  
389 both stressed conditions superceded the growth rate of any single stressed bacteria or  
390 control. Mid-log phase data (**Figure 2D**) showed that there was no significant changes  
391 in terms of growth rate between control and cadmium pre-exposed bacteria, but  
392 growth was drastically reduced after amoxicillin treatment. Whereas, *Staphylococcus*  
393 overcame the inhibitory effect of antibiotic by showing increased growth rate in both  
394 amoxicillin and pre-exposed cadmium settings.

395

#### 396 **Co-exposure effect on the susceptibility of amoxicillin**

397 To determine the minimum inhibitory concentration of Amoxicillin for *S. aureus*  
398 under co-exposure of chromium and amoxicillin, the agar dilution method was  
399 carried out with Tryptone soya Agar media with or without 0.06  $\mu$ g/mL to 0.5  
400  $\mu$ g/mL of Amoxicillin trihydrate. Amoxicillin untreated (e.g. control) agar plate  
401 shows plenty of colonies, whereas only 2-3 cfu/per spot were grown in 0.06 $\mu$ g/mL  
402 of Amoxicillin trihydrate treated agar plate for untreated bacteria. But no visible  
403 bacterial colony was observed in the plates containing 0.125 $\mu$ g/mL of Amoxicillin  
404 (**Figure 3A**). Therefore, the minimum inhibitory concentration of Amoxicillin  
405 trihydrate for untreated *S. aureus* is 0.06  $\mu$ g/mL. But for chromium, or Amoxicillin or  
406 both treated bacteria, the minimum inhibitory concentration of Amoxicillin  
407 trihydrate increased gradually and the data shows that the MIC were 0.125 $\mu$ g/mL  
408 for chromium pre-exposed bacteria, 0.25 $\mu$ g/mL for Amoxicillin pre-exposed  
409 bacteria and 0.5 $\mu$ g/mL for both chromium and Amoxicillin pre-exposed bacteria.  
410 The Antibiotic-Chromium co-exposure assay demonstrated that the MIC for  
411 Amoxicillin increased by 8-fold in low-dose of chromium-Amoxicillin co-exposed *S.*

412 *aureus*, whereas only chromium exposure increased MIC by 2-fold and Amoxicillin  
413 exposure increased it by 4-fold compared to control (**Figure 3B**).

414

415 **Antimicrobial susceptibility patterns of chromium pre-exposed *S. aureus*:**

416 *Staphylococcus aureus* ST80 was grown in liquid broth media from MIC value of  
417 0.06µg/mL, 0.125µg/mL, 0.25µg/mL, 0.5µg/mL under no stress, only chromium or  
418 amoxicillin or both stressed conditions. These bacterial suspensions were spread on  
419 Mueller-Hinton Agar Media. From the measurements of zone of inhibition (ZOI) for  
420 Amoxicillin antibiotic disc, baseline data shows that *Staphylococcus aureus* ST80 was  
421 resistant to Amoxicillin 10µg (e.g. zone of inhibition was 28 mm) under all stressed  
422 condition. The ZOI for untreated bacteria was 32 mm, whereas for chromium or  
423 amoxicillin or both treatment this value was 28 mm, 27mm and 26 mm, respectively  
424 (Figure 3C). Overall, the susceptibility patterns for amoxicillin have demonstrated  
425 that co-exposure of a lower dose of chromium and amoxicillin significantly  
426 decreased the size of ZOI, which ultimately modify amoxicillin susceptible *S. aureus*  
427 to emerge amoxicillin resistant *S. aureus*.

428

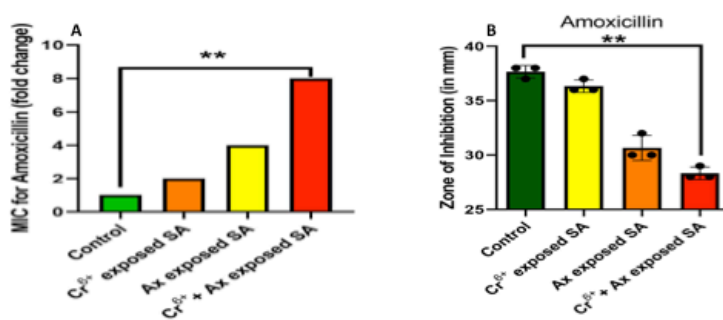

429

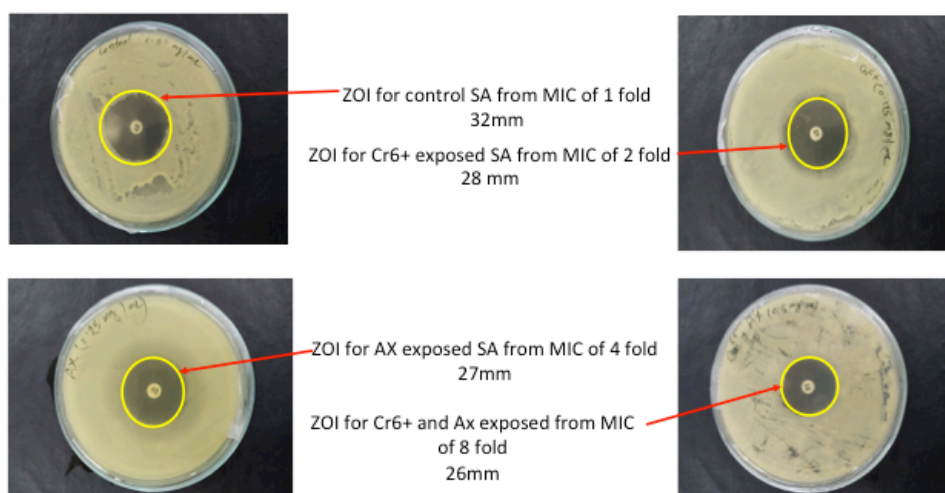

429

430 **Figure 3: Amoxicillin susceptibility patterns of chromium and amoxicillin pre-**  
431 **exposed *S. aureus*:** Figure (A) shows the fold change of MIC for amoxicillin. Briefly,  
432 *S. aureus* was pre-exposed with a lower dose of chromium and amoxicillin for 48  
433 hours and then 10 $\mu$ L (e.g.  $1 \times 10^5$  cfu) of 10 times diluted bacterial suspension was  
434 loaded on Tryptone soya Agar plates containing different levels (0.06 $\mu$ g/mL,  
435 0.125 $\mu$ g/mL, 0.25 $\mu$ g/mL, 0.5 $\mu$ g/mL) of Amoxicillin trihydrate and incubated at 37 $^{\circ}$ C  
436 for 20 hours. The control media contains no antibiotic. Figure (B) and (C) show the  
437 bar chart of ZOI and representative antimicrobial susceptibility test images for  
438 amoxicillin. Briefly, *S. aureus* was pre-exposed with a lower dose of chromium and  
439 amoxicillin for 48 hours and then 100  $\mu$ L (e.g.  $1 \times 10^7$  cfu) bacterial suspension was  
440 spread on each plate and incubated at 37 $^{\circ}$ C for 20 hours. Data are shown as mean  $\pm$   
441 SEM and statistical analysis was performed with one-way ANOVA and Sidak's post-  
442 hoc test, \*\* $p < 0.01$ ,  $n = 3$ .

443

444

#### 445 **Co-exposure Effect of cadmium and amoxicillin on susceptibility of amoxicillin**

446 To determine the minimum inhibitory concentration of Amoxicillin for *S. aureus*  
447 under co-exposure of cadmium and amoxicillin, the agar dilution method was  
448 carried out with Tryptone soya Agar media with or without 0.06 $\mu$ g/mL to 4.0 $\mu$ g/mL  
449 of Amoxicillin trihydrate. Amoxicillin untreated (e.g. control) agar plate shows  
450 plenty of colonies, whereas only 2-3 cfu/per spot were grown in 0.06 $\mu$ g/mL of  
451 Amoxicillin trihydrate treated agar plate for untreated bacteria. But no visible  
452 bacterial colonies were observed in the plates containing 0.125 $\mu$ g/mL of Amoxicillin  
453 (**Figure 4A**). Therefore, the minimum inhibitory concentration of Amoxicillin  
454 trihydrate for untreated *S. aureus* is 0.06 $\mu$ g/mL. But for amoxicillin, cadmium and  
455 both treated bacteria the minimum inhibitory concentration (MIC) of Amoxicillin  
456 trihydrate was increased gradually and the value is 0.25 $\mu$ g/mL, 1.0  $\mu$ g/mL, 2.0  
457  $\mu$ g/mL respectively. The Antibiotic-Cadmium co-exposure assay demonstrated that  
458 the MIC for Amoxicillin increased by 32-fold in low-dose of cadmium- Amoxicillin  
459 co-exposed *S. aureus*, Whereas, only Amoxicillin exposure increased MIC by 4-fold  
460 and cadmium exposure increased it by 16-fold compared to control (**Figure 4B**).

461

#### 462 **Antibiotic susceptibility pattern of cadmium pre-exposed *S. aureus*:**

463 *Staphylococcus aureus* ST80 was further grown in trypsin soya broth medium where  
464 the bacterial colonies were inoculated from MIC 1, MIC 4, MIC 16 and MIC 32 of *S.*  
465 *aureus*. These MICs for amoxicillin were emerged due to cadmium and/or  
466 amoxicillin pre-exposure in the milieu of *S. aureus* growth. These bacterial  
467 suspensions were spread on Mueller-Hinton Agar Media (Supplementary figure S1).  
468 From the measurements of zone of inhibition for Amoxicillin antibiotic disc, baseline  
469 data shows that *Staphylococcus aureus* ST80 was resistant to Amoxicillin 10 $\mu$ g (e.g.  
470 zone of inhibition was 28 mm) under all stressed condition. The size of zone of  
471 inhibition was significantly decreased from untreated to treated condition. Whereas  
472 the ZOI for untreated bacteria was 32 mm, for amoxicillin or cadmium or both  
473 treatments this value was respectively 27 mm, 26 mm and 25 mm. That means, this  
474 resistance patterns for Amoxicillin increased significantly with co-exposure of  
475 cadmium and/or amoxicillin (Supplementary figure S2).  
476  
477

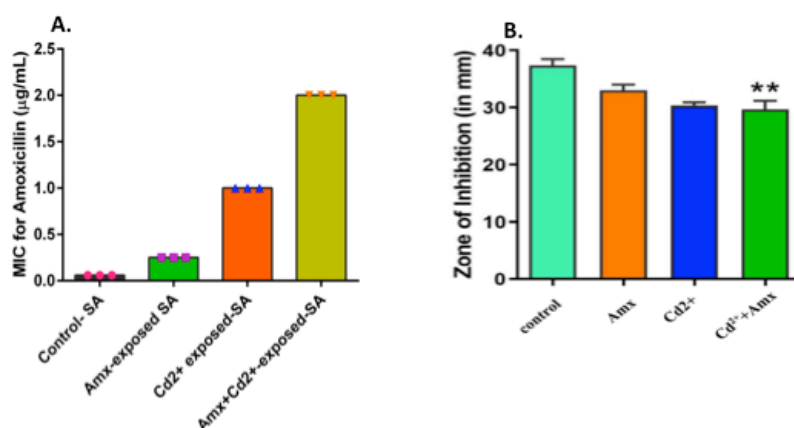

478  
479 **Figure 4: Amoxicillin susceptibility patterns of cadmium and amoxicillin pre-**  
480 **exposed *S. aureus*:** Figure (A) shows the MIC for amoxicillin. Briefly, *S. aureus* was  
481 pre-exposed with a lower dose of cadmium and amoxicillin for 48 hours and then  
482 10 $\mu$ L (e.g. 1x10<sup>5</sup> cfu) of 10 times diluted bacterial suspension (adjusted O.D was  
483 0.125 at 600nm) was loaded on Tryptone soya Agar plates containing different levels  
484 (0.06 $\mu$ g/mL, 0.125 $\mu$ g/mL, 0.25 $\mu$ g/mL, 0.5 $\mu$ g/mL, 1.0 $\mu$ g/mL, 2.0 $\mu$ g/mL, 4.0 $\mu$ g/mL) of  
485 Amoxicillin trihydrate and incubated at 37<sup>0</sup>C for 20 hours. Figure (B) shows the ZOI  
486 for Amoxicillin. Briefly, *S. aureus* was pre-exposed with a lower dose of cadmium  
487 and amoxicillin for 48 hours and then 100  $\mu$ L (e.g. 1x10<sup>7</sup> cfu) bacterial suspension  
488 was spread on each plate containing bacteria and incubated at 37<sup>0</sup>C for 20 hours. Data

489 are shown as mean  $\pm$  SEM and statistical analysis was performed with one-way  
 490 ANOVA and Sidak's post-hoc test, \*\*p<0.01, n=3.

491

492 **Expression patterns of efflux pumps and Femx gene in *S. aureus***

493 As demonstrated in antimicrobial susceptibility patterns, co-exposure of amoxicillin  
 494 and heavy metals like chromium and cadmium alter amoxicillin susceptibility and  
 495 emerge amoxicillin resistant *Staphylococcus aureus*. We hypothesized that the  
 496 alteration of antimicrobial susceptibility may be associated with the changes of  
 497 expression of resistance genes or efflux pumps, which are involved in drug efflux. To  
 498 address this hypothesis, the expression levels of factor C (femX), efflux pumps mepA  
 499 and norA of *S. aureus* were assessed by RT-qPCR as RNA level.

500

501

502

503 **Table 3.3: Concentration and purity of RNA of *S. aureus* and the synthesized**

504 **cDNA**

| Condition                             | Sample               | RNA concentration (ng/ $\mu$ l) | cDNA concentration (ng/ $\mu$ l) | Absorbance ratio (260nm/280nm) | Absorbance ratio (260nm/230nm) |
|---------------------------------------|----------------------|---------------------------------|----------------------------------|--------------------------------|--------------------------------|
| 48 hours pre-exposed <i>S. aureus</i> | Control              | 160.4                           | 1500.1                           | 1.82                           | 2.15                           |
|                                       | Cr <sup>6+</sup>     | 167.0                           | 1762.2                           | 1.75                           | 2.07                           |
|                                       | Ax                   | 126.0                           | 1165.3                           | 1.83                           | 2.23                           |
|                                       | Cr <sup>6+</sup> +Ax | 179.3                           | 1352.3                           | 1.81                           | 2.18                           |
|                                       | Cr <sup>6+</sup>     | 167.0                           | 1262.0                           | 1.82                           | 2.22                           |
|                                       | Ax                   | 360.1                           | 1240.9                           | 1.84                           | 2.23                           |
|                                       | Cr <sup>6+</sup> +Ax | 135.9                           | 1219.2                           | 1.83                           | 2.21                           |
|                                       | Ax                   | 149.9                           | 1297.5                           | 1.84                           | 2.24                           |
|                                       | Cr <sup>6+</sup> +Ax | 134.2                           | 1226.0                           | 1.82                           | 2.19                           |
| Un-exposed <i>S. aureus</i>           | Control              | 235.9                           | 1279.0                           | 1.82                           | 2.21                           |
|                                       | Cr <sup>6+</sup>     | 240.3                           | 1144.1                           | 1.83                           | 2.23                           |
|                                       | Ax                   | 284.0                           | 1252.4                           | 1.83                           | 2.23                           |
|                                       | Cr <sup>6+</sup> +Ax | 270.9                           | 1127.1                           | 1.81                           | 2.21                           |
|                                       | Cr <sup>6+</sup>     | 236.8                           | 1316.7                           | 1.83                           | 2.20                           |
|                                       | Cr <sup>6+</sup> +Ax | 158.9                           | 1074.5                           | 1.82                           | 2.22                           |

505

506 The overall quality of an RNA preparation was assessed by electrophoresis on a  
507 denaturing agarose gel that would also give some information about RNA yield. A  
508 denaturing gel system was used because most RNA form extensive secondary  
509 structure via intramolecular base pairing, and thus prevents it from migrating strictly  
510 according to its size. **Figure 5A** shows the 5s RNA smear which assures the quality  
511 and yield of RNA. Wells with light band denoted disintegrated RNA, which were  
512 further extracted. Moreover, to assure the target genes at DNA level and the quality of  
513 RT-qPCR gel run was performed. **Figure 5B** indicated the bands for *femX*, *mepA*,  
514 *norA* and house-keeping gene GAPDH after RT-qPCR. As the product size of RT-  
515 qPCR for the above genes was very close (hence the molecular weight will be very  
516 close to each other), the bands of all genes were found in the same alignment after  
517 Agarose gel electrophoresis. **Figure 5C** showed that all the targeted genes (*femX*,  
518 *mepA*, *norA*, GAPDH) were absolutely amplified following the corresponding Ct  
519 value (number of threshold cycle) for control, amoxicillin, chromium and both  
520 amoxicillin-chromium exposed condition. **Figure 5D** denoted that the resistance-  
521 related factors *femX*, *mepA*, and *norA* all were up-regulated in chromium and both  
522 chromium-amoxicillin pre-exposed *S. aureus* compared with the control group. *S.*  
523 *aureus* bacterial culture was pre-exposed to chromium salt for 48 hours, which up-  
524 regulated the mRNA expression of *femX* by 25-fold, and *mepA* by 19-fold and *norA*  
525 by 17-fold compared to control. Whereas, under the co-exposure condition of  
526 chromium-amoxicillin, the expression of *femX* increased by 7-fold, *mepA* increased  
527 by 10-fold and *norA* increased by 8-fold. In contrast, the expression of these genes  
528 was not altered in amoxicillin pre-exposed *S. aureus*. Overall, these findings indicate  
529 that heavy metals pre-exposed or heavy metals-antibiotics co-exposed condition up-  
530 regulated the expression of drug-resistance genes *norA*, *mepA* and *femX*, which

531 might be responsible for emergence of amoxicillin resistant *S. aureus*.

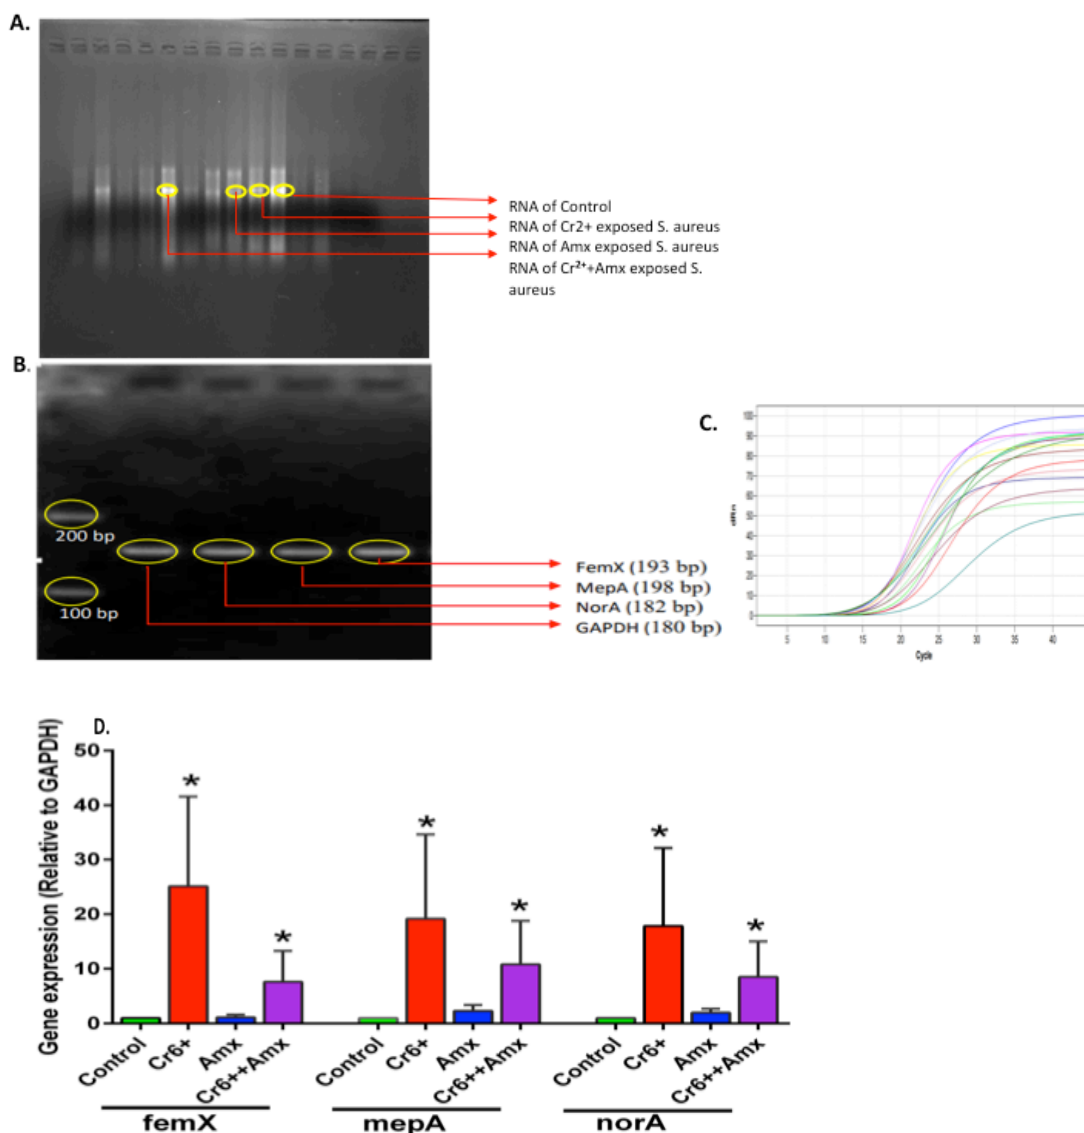

532

533

534 Figure 5: **Relative gene expression in chromium and/or amoxicillin pre-exposed**  
535 ***S. aureus***. (A) Band of 5s RNA in Agarose gel electrophoresis. 1.3%, 40 mL gel was  
536 prepared with 1X MOPS buffer. Formaldehyde Load Dye was added to each RNA  
537 sample as a 1:3 of sample to dye ratio. 8.0  $\mu$ L sample was loaded on each well. After  
538 electrophoresis at 75 V for 30 minutes, the bands were visualized under gel doc. (B)  
539 PCR band for product size. (C) Gene amplification. (D) The bar chart for the relative  
540 expression of norA, mecA and femx. Data are presented as fold changes on the basis  
541 of calculation of gene expression using relative quantification,  $RQ=2^{-\Delta\Delta Ct}$ . Data are  
542 shown as mean  $\pm$  SEM and statistical analysis was performed with unpaired t-test  
543 (two-tailed), non-parametric, Mann whitney t-test. ( $n = 3$ , asterisk\* represents up-  
544 regulation,  $*P < 0.05$ ).

545

## 546 **Discussion**

547 Antimicrobial resistant (AMR) *S. aureus* is one of the leading bacterial causes of  
548 infection-associated death, globally (32, 33). *Staphylococci* have acquired AMR-  
549 determinants by horizontal gene transfer of mobile genetic elements, by mutations of  
550 drug binding sites of target sites and by increasing expression of endogenous efflux  
551 pumps (34-36). Industrial processes are responsible for direct deposition of heavy into  
552 water, soil, and the atmosphere. Besides, combined contamination of heavy metals  
553 and antibiotics contribute to the emergence of multi-drug resistant microbes (2). The  
554 deposition of heavy metals in the environment is coupled with their persistence allows  
555 for long-term impacts and interactions with microbial communities. The success of  
556 bacterial pathogens in the environment is driven by their ability to adapt, spread and  
557 establish ecological reservoirs (37). An important determinant of this adaptation is the  
558 acquisition of genes that confer resistance, or increase already existing resistance, to  
559 antibiotics and heavy metals (37-39).

560

561 Studies with Gram-negative bacteria demonstrated that multiple heavy  
562 metals/antibiotic resistance genes generally reside on extra chromosomal DNA such  
563 as a plasmid (2, 40). One of the main mechanisms for microorganisms' acquisition of  
564 antibiotic resistance under heavy metals selective pressure is i. co-resistance. Favored  
565 by evolution, co-resistance, is the occurrence of multiple resistances via the same  
566 mobile genetic elements (41). The physical linkage of antibiotic resistance and metal  
567 resistance encoded on the plasmid, for example, confers these resistances to the  
568 bacteria even when only one co-selecting agent (i.e., antibiotics or heavy metals) is  
569 present (40). Whereas, a recent study demonstrated that river isolated *Staphylococci*  
570 showed an extra chromosomal independent multiple heavy metals and multiple  
571 antibiotic resistance (42). This study also demonstrated plasmid-harboring  
572 *Staphylococcus* isolates did not show any effect in their multiple antibiotic and heavy  
573 metal resistance profile despite the elimination of all plasmids (42). These  
574 observations imply that multi-drug and multi-metal resistant ability of river isolates of  
575 *Staphylococcus* was determined by the chromosome.

576 In this study, we hypothesized that heavy metals may alter the level of antibiotic  
577 susceptibility and facilitate to emerge multi-drug resistant *S. aureus*. To address this  
578 hypothesis, the antimicrobial susceptibility profiles were assessed of naturally isolated



579 *Staphylococcus* from processed raw meat and culturally grown *Staphylococcus* with a  
580 minimum tolerable level of chromium or cadmium. This investigation shows that  
581 *Staphylococcus aureus* ST80 can tolerate up to 3mM  $K_2Cr_2O_7$  and 0.5mM  $CdCl_2 \cdot H_2O$   
582 salts. Previously, a study reported that the minimum inhibition concentrations (MICs)  
583 varied from strain to strain of *Staphylococcus* (43). For example the MIC of  
584  $CuSO_4 \cdot 5H_2O$ ,  $Cd(NO_3)_2 \cdot 4H_2O$ ,  $NaAsO_2$ , and  $ZnSO_4 \cdot 7H_2O$  was 2, 0.25, 1, 0.25mM  
585 for, *Staphylococcus haemolyticus* BB02312, for *Staphylococcus aureus* RN4220 was  
586 4, 0.015, 4, 0.015 mM and for *Staphylococcus haemolyticus* NW19A the MIC was 8,  
587 0.4, 4, 8 mM, respectively (43). Whereas, the MICs of  $Cu^{2+}$ ,  $Zn^{2+}$ ,  $Cd^{2+}$ ,  $Cr_2O_7^{2-}$ , and  
588  $Ag^+$  respectively were 16, 10, 2.5, 1.6 and 0.25 mM for LSJC7, a member of  
589 *Enterobacteriaceae* (9).

590 The antimicrobial susceptibility profile of this study revealed that minimal inhibitory  
591 concentrations of chromium or cadmium and amoxicillin pre-exposure are responsible  
592 to emerge amoxicillin resistant *S. aureus*. The alteration of antimicrobial  
593 susceptibility in chromium and cadmium salt pre-exposed bacteria might be  
594 responsible for emerging antibiotic resistance superbugs in environmental reservoirs.  
595 The current observations strongly supported by a recent systemic review, where they  
596 showed fourteen published research articles reported the co-occurrence of heavy  
597 metal and antibiotic resistance (44). Under selective pressures, microorganisms also  
598 acquire antimicrobial resistance by cross-resistance when the route of heavy metals  
599 and antimicrobial agents accessed to their target bacteria are similar but not same (2).  
600 Evidence of cross-resistance can be found in studies with heavy metal-contaminated  
601 environments demonstrating potential microbial adaptation to the environmental  
602 selective pressure by acquisition of resistance (40). The most common form of cross-  
603 resistance results from the microbial utilization of an efflux pump, a cellular  
604 membrane to transport protein (40).

605 To assess efflux pumps and resistance gene expression at RNA level, the current  
606 study adopted the reverse transcription quantitative polymerase chain reaction (RT-  
607 qPCR). The RT-qPCR data demonstrated that the expression of *femX*, *mepA* and  
608 *norA* have significantly increased in chromium and a lower-dose of amoxicillin pre-  
609 exposed *S. aureus* compared to unexposed bacteria. These findings were supported by  
610 previous studies with different bacteria, heavy metals and antibiotic co-exposure  
611 settings (9, 45, 46). Moreover, previous study also demonstrated that at metabolic  
612 stress condition, cell transporters especially efflux pumps, antiporters remove heavy

613 metals and antibiotics from cells in a cross-resistance manner, which is known as  
614 cross-regulation (2).

615 In addition, other studies have reported that the expression of bacterial antibiotic  
616 resistance systems were induced by heavy metals, for example, the transcription of  
617 multi-drug efflux pump genes *acrD* and *mdtABC* in *Salmonella enterica*, were  
618 induced by a two-component signal transduction system BaeRS in response to copper  
619 or zinc resulting in enhanced antibiotic resistance (45). Besides, chromate or copper  
620 modifies SoxS regulator and hence enhances the expression of multi-drug efflux  
621 pump AcrAB-TolC in *E. coli* (47). These proposed efflux pumps (e.g. AcrAB-TolC)  
622 are mostly responsible for conferring resistance against diverse antibiotics (47).  
623 Recently, in a tissue cage infection model study demonstrated that in-complete or  
624 improper regimen of amoxicillin against *S. aureus* cause to induce amoxicillin  
625 resistance genes such as *mecA*, *femA*, *femB* and *femX* gene (46). Another study has  
626 demonstrated that heavy metals with no nutritional benefits for microorganisms cause  
627 oxidative stress (48) that might trigger adaptations and bacterial growth in heavy  
628 metals and antimicrobial co-contamination settings. Presumably, high and chronic  
629 exposure to heavy metals and metals cause irreversible damage to bacterial DNA and  
630 the cell membrane, which later acts as an environmental selector for cellular defense  
631 (49). This defense pathway could habituate bacteria to grow in presence of heavy  
632 metals, which may contribute to acquire resistance to heavy metals and antibiotics as  
633 a cross-resistance fashion. The recent study on bacterial resistance to heavy metals  
634 supported these earlier observations, where they showed that whether an intrinsic,  
635 natural, or a selective pressure-induced modification, bacteria acquire antimicrobial  
636 resistance through increases co- and/or cross-resistance pathways (50). These  
637 observations and current study findings have strongly supported a mechanistic  
638 explanation (e.g. cross-resistance/regulation) behind the emergence of amoxicillin  
639 resistant *S. aureus* in the heavy metal and antibiotic co-contamination setting.

640

## 641 **Conclusion**

642 This study demonstrates culture-based and molecular-based methods for chromium or  
643 cadmium and a lower-dose of amoxicillin pre-exposure is responsible to emerge  
644 amoxicillin resistant *S. aureus*. However, it is warranted to validate the current  
645 observed antibiotic resistant patterns in the corresponding efflux pumps knockout

646 model of *S. aureus*. The efflux pump may effectively regulate the interaction of both  
647 heavy metals and antibiotics by conferring resistance.

648  
649

## 650 ACKNOWLEDGMENTS

651 The work is supported by two research grants funded by the Ministry of Education,  
652 Bangladesh (Banbeis, GARE ID LS2019989) and the Ministry of Science and  
653 Technology, Bangladesh (2021-2022). The Atomic Absorption Spectroscopy is  
654 supported by Bangladesh Council of Scientific and Industrial Research (BCSIR).  
655 RNA extraction, RT-qPCR and Biosafety-2 supported by Molecular Biology lab  
656 Genomic research lab and BSL-2 lab, department of Biochemistry and Molecular  
657 Biology, University of Dhaka, Bangladesh.

658

## 659 AUTHOR CONTRIBUTIONS

660 TNI and FSM have equally conducted and analysed experiments. RY optimized RT-  
661 qPCR with bacterial RNA. MBI isolated bacterial strain. TR and DHD reviewed the  
662 manuscript. MM designed experiments and reviewed analysis with TNI and FSM.  
663 MM, TNI and FSM wrote the manuscript with input of all authors.

664

## 665 COMPETING INTERESTS

666 The authors declare no competing interests.

667

## 668 REFERENCES

- 669 1. Zhang R, Eggleston K, Rotimi V, Zeckhauser RJ. Antibiotic resistance as a global  
670 threat: evidence from China, Kuwait and the United States. *Global Health*.  
671 2006;2(1):6.  
672 2. Baker-Austin C, Wright M, Stepanauskas R, McArthur J. Co-selection of  
673 antibiotic and metal resistance. *Trends in Microbiology*. 2006;14(4):176-82.  
674 3. Seiler C, Berendonk T. Heavy metal driven co-selection of antibiotic resistance  
675 in soil and water bodies impacted by agriculture and aquaculture. *Frontiers in*  
676 *Microbiology*. 2012;3.

- 677 4. Ahmad JU, Goni MA. Heavy metal contamination in water, soil, and vegetables  
678 of the industrial areas in Dhaka, Bangladesh. *Environ Monit Assess.* 2010;166(1-  
679 4):347-57.
- 680 5. Gupta N, Khan DK, Santra SC. An assessment of heavy metal contamination in  
681 vegetables grown in wastewater-irrigated areas of Titagarh, West Bengal, India.  
682 *Bull Environ Contam Toxicol.* 2008;80(2):115-8.
- 683 6. Martínez JL, Rojo F. Metabolic regulation of antibiotic resistance. *FEMS*  
684 *Microbiol Rev.* 2011;35(5):768-89.
- 685 7. Zhu Y-G, Johnson TA, Su J-Q, Qiao M, Guo G-X, Stedtfeld RD, et al. Diverse and  
686 abundant antibiotic resistance genes in Chinese swine farms. *Proc Natl Acad Sci*  
687 *U S A.* 2013;110(9):3435-40.
- 688 8. Looft T, Johnson TA, Allen HK, Bayles DO, Alt DP, Stedtfeld RD, et al. In-feed  
689 antibiotic effects on the swine intestinal microbiome. *Proc Natl Acad Sci U S A.*  
690 2012;109(5):1691-6.
- 691 9. Chen S, Li X, Sun G, Zhang Y, Su J, Ye J. Heavy metal induced antibiotic  
692 resistance in bacterium LSJC7. *Int J Mol Sci.* 2015;16(10):23390-404.
- 693 10. Heuer H, Schmitt H, Smalla K. Antibiotic resistance gene spread due to  
694 manure application on agricultural fields. *Curr Opin Microbiol.* 2011;14(3):236-  
695 43.
- 696 11. Khan S, Cao Q, Zheng YM, Huang YZ, Zhu YG. Health risks of heavy metals in  
697 contaminated soils and food crops irrigated with wastewater in Beijing, China.  
698 *Environ Pollut.* 2008;152(3):686-92.
- 699 12. Knapp CW, McCluskey SM, Singh BK, Campbell CD, Hudson G, Graham DW.  
700 Antibiotic resistance gene abundances correlate with metal and geochemical  
701 conditions in archived Scottish soils. *PLoS One.* 2011;6(11):e27300.
- 702 13. Peltier E, Vincent J, Finn C, Graham DW. Zinc-induced antibiotic resistance in  
703 activated sludge bioreactors. *Water Res.* 2010;44(13):3829-36.
- 704 14. Berg J, Tom-Petersen A, Nybroe O. Copper amendment of agricultural soil  
705 selects for bacterial antibiotic resistance in the field. *Lett Appl Microbiol.*  
706 2005;40(2):146-51.
- 707 15. Lowy FD. *Staphylococcus aureus* infections. *New England journal of*  
708 *medicine.* 1998;339(8):520-32.
- 709 16. Ahsan MA, Satter F, Siddique MAB, Akbor MA, Ahmed S, Shajahan M, et al.  
710 Chemical and physicochemical characterization of effluents from the tanning and  
711 textile industries in Bangladesh with multivariate statistical approach. *Environ*  
712 *Monit Assess.* 2019;191(9):575.
- 713 17. Hassan M, Rahman MATMT, Saha B, Kamal AKI. Status of heavy metals in  
714 water and sediment of the Meghna river, Bangladesh. *Am J Environ Sci.*  
715 2015;11(6):427-39.
- 716 18. Wiegand I, Hilpert K, Hancock REW. Agar and broth dilution methods to  
717 determine the minimal inhibitory concentration (MIC) of antimicrobial  
718 substances. *Nat Protoc.* 2008;3(2):163-75.
- 719 19. Bera A, Biswas R, Herbert S, Kulauzovic E, Weidenmaier C, Peschel A, et al.  
720 Influence of wall teichoic acid on lysozyme resistance in *Staphylococcus aureus*. *J*  
721 *Bacteriol.* 2007;189(1):280-3.
- 722 20. Atshan SS, Shamsudin MN, Lung LTT, Ling KH, Sekawi Z, Pei CP, et al.  
723 Improved method for the isolation of RNA from bacteria refractory to disruption,  
724 including *S. aureus* producing biofilm. *Gene.* 2012;494(2):219-24.

- 725 21. Blair JMA, Webber MA, Baylay AJ, Ogbolu DO, Piddock LJV. Molecular  
726 mechanisms of antibiotic resistance. *Nat Rev Microbiol*. 2015;13(1):42-51.
- 727 22. Karam G, Chastre J, Wilcox MH, Vincent J-L. Antibiotic strategies in the era of  
728 multidrug resistance. *Crit Care*. 2016;20(1):136.
- 729 23. Spengler G, Kincses A, Gajdács M, Amaral L. New Roads leading to old  
730 destinations: Efflux pumps as targets to reverse multidrug resistance in bacteria.  
731 *Molecules*. 2017;22(3):468.
- 732 24. Webber MA, Piddock LJV. The importance of efflux pumps in bacterial  
733 antibiotic resistance. *J Antimicrob Chemother*. 2003;51(1):9-11.
- 734 25. Huet AA, Raygada JL, Mendiratta K, Seo SM, Kaatz GW. Multidrug efflux pump  
735 overexpression in *Staphylococcus aureus* after single and multiple in vitro  
736 exposures to biocides and dyes. *Microbiology*. 2008;154(Pt 10):3144-53.
- 737 26. Kaatz GW, DeMarco CE, Seo SM. MepR, a repressor of the *Staphylococcus*  
738 *aureus* MATE family multidrug efflux pump MepA, is a substrate-responsive  
739 regulatory protein. *Antimicrob Agents Chemother*. 2006;50(4):1276-81.
- 740 27. Paulsen IT, Brown MH, Skurray RA. Proton-dependent multidrug efflux  
741 systems. *Microbiol Rev*. 1996;60(4):575-608.
- 742 28. Livak KJ, Schmittgen TD. Analysis of relative gene expression data using real-  
743 time quantitative PCR and the  $2^{-\Delta\Delta C(T)}$  Method. *Methods*.  
744 2001;25(4):402-8.
- 745 29. Wu X, Cobbina S, Mao G, Xu H, Zhang Z, Yang L. A review of toxicity and  
746 mechanisms of individual and mixtures of heavy metals in the environment.  
747 *Environmental Science and Pollution Research*. 2016;23(9):8244-59.
- 748 30. Ahmad JU GM. Heavy metal contamination in water,  
749 soil, and vegetables of the industrial areas in Dhaka, Bangladesh 2010; 166:[347-  
750 57 pp.].
- 751 31. Ahmad MK IS, Rahman S, Haque M, Islam MM. Heavy  
752 metals in water, sediment and some fishes of Buriganga River,  
753 Bangladesh 2010; 4(2):[321-32 pp.].
- 754 32. Collaborators GAR. Global mortality associated with 33 bacterial pathogens  
755 in 2019: a systematic analysis for the Global Burden of Disease Study 2019.  
756 *Lancet*. 2022;400(10369):2221-48.
- 757 33. Gona PN, More AF. Bacterial pathogens and climate change. *Lancet*.  
758 2022;400(10369):2161-3.
- 759 34. Jensen SO, Lyon BR. Genetics of antimicrobial resistance in *Staphylococcus*  
760 *aureus*. *Future Microbiol*. 2009;4(5):565-82.
- 761 35. Foster TJ. Antibiotic resistance in *Staphylococcus aureus*. Current status and  
762 future prospects. *FEMS Microbiol Rev*. 2017;41(3):430-49.
- 763 36. Pennone V, Prieto M, Álvarez-Ordóñez A, Cobo-Díaz JF. Antimicrobial  
764 Resistance Genes Analysis of Publicly Available. *Antibiotics (Basel)*. 2022;11(11).
- 765 37. Hanssen AM, Ericson Sollid JU. SCCmec in staphylococci: genes on the move.  
766 *FEMS Immunol Med Microbiol*. 2006;46(1):8-20.
- 767 38. Aktan Y, Tan S, Içgen B. Characterization of lead-resistant river isolate  
768 *Enterococcus faecalis* and assessment of its multiple metal and antibiotic  
769 resistance. *Environ Monit Assess*. 2013;185(6):5285-93.
- 770 39. Ozer G, Ergene A, Içgen B. Biochemical and Molecular Characterization of  
771 Strontium-resistant Environmental Isolates of *Pseudomonas fluorescens* and  
772 *Sphingomonas paucimobilis*. *Geomicrobiology Journal*. 2013;30(5):381-90.

- 773 40. Pal C, Bengtsson-Palme J, Kristiansson E, Larsson DG. Co-occurrence of  
774 resistance genes to antibiotics, biocides and metals reveals novel insights into  
775 their co-selection potential. *BMC Genomics*. 2015;16:964.
- 776 41. Ye J, Rensing C, Su J, Zhu YG. From chemical mixtures to antibiotic resistance.  
777 *J Environ Sci (China)*. 2017;62:138-44.
- 778 42. Yilmaz F, Orman N, Serim G, Kochan C, Ergene A, Icgen B. Surface water-  
779 borne multidrug and heavy metal-resistant *Staphylococcus* isolates  
780 characterized by 16S rDNA sequencing. *Bull Environ Contam Toxicol*.  
781 2013;91(6):697-703.
- 782 43. Xue H, Wu Z, Li L, Li F, Wang Y, Zhao X. Coexistence of Heavy Metal and  
783 Antibiotic Resistance within a Novel Composite *Staphylococcal* Cassette  
784 Chromosome in a *Staphylococcus haemolyticus* Isolate from Bovine Mastitis  
785 Milk. *Antimicrobial Agents and Chemotherapy*. 2015;59(9):5788-92.
- 786 44. Nguyen CC, Hugie, C.N., Kile, M.L. *et al*. Association between heavy metals and  
787 antibiotic-resistant human pathogens in environmental reservoirs: A  
788 review2019; 46(13).
- 789 45. Nishino K, Nikaido E, Yamaguchi A. Regulation of multidrug efflux systems  
790 involved in multidrug and metal resistance of *Salmonella enterica* serovar  
791 Typhimurium. *J Bacteriol*. 2007;189(24):9066-75.
- 792 46. Yao Q, Gao L, Xu T, Chen Y, Yang X, Han M, et al. Amoxicillin Administration  
793 Regimen and Resistance Mechanisms of. *Front Microbiol*. 2019;10:1638.
- 794 47. Harrison JJ, Tremaroli V, Stan MA, Chan CS, Vacchi-Suzzi C, Heyne BJ, et al.  
795 Chromosomal antioxidant genes have metal ion-specific roles as determinants of  
796 bacterial metal tolerance. *Environ Microbiol*. 2009;11(10):2491-509.
- 797 48. T K. Online textbook of bacteriology2012.
- 798 49. Safari Sinigani AA, Younessi N. Antibiotic resistance of bacteria isolated from  
799 heavy metal-polluted soils with different land uses. *J Glob Antimicrob Resist*.  
800 2017;10:247-55.
- 801 50. Gorovtsov AV, Sazykin IS, Sazykina MA. The influence of heavy metals,  
802 polyaromatic hydrocarbons, and polychlorinated biphenyls pollution on the  
803 development of antibiotic resistance in soils. *Environ Sci Pollut Res Int*.  
804 2018;25(10):9283-92.  
805
